# Supplementary material
Source: publisher site journal article supplement (https://www.dovepress.com/article/556267)
Supplement: Supplementary file 1 [file 556267_556267%20Updated%20Supplementary%20Material.pdf]

***Task-Shifting from Acupuncturists to Nurses in Delivering Acupuncture/Acupressure or Supervising Patient Self-Administered Acupressure for Sleep Management: Is It Feasible?***

Fei-Yi Zhao<sup>1,2,3,4†</sup>, Wen-Jing Zhang<sup>4†</sup>, Chin-Moi Chow<sup>3,5†</sup>, Yuan Xin Lee<sup>4</sup>, Peijie Xu<sup>6</sup>, Yuen-Shan Ho<sup>7\*</sup>, Qiang-Qiang Fu<sup>8\*</sup>, Russell Conduit<sup>2</sup>

<sup>1</sup> Department of Nursing, School of International Medical Technology, Shanghai Sanda University, Shanghai, 201209, People's Republic of China

<sup>2</sup> School of Health and Biomedical Sciences, RMIT University, Bundoora, VIC, 3083, Australia

<sup>3</sup> Sydney School of Health Sciences, Faculty of Medicine and Health, The University of Sydney, Camperdown, NSW, 2050, Australia

<sup>4</sup> Shanghai Municipal Hospital of Traditional Chinese Medicine, Shanghai University of Traditional Chinese Medicine, Shanghai, 200071, People's Republic of China

<sup>5</sup> Sleep Research Group, Charles Perkins Centre, The University of Sydney, Camperdown, NSW, 2050, Australia

<sup>6</sup> School of Computing Technologies, RMIT University, Melbourne, VIC, 3000, Australia

<sup>7</sup> School of Nursing, Faculty of Health and Social Sciences, The Hong Kong Polytechnic University, Hong Kong SAR, People's Republic of China

<sup>8</sup> Yangpu Hospital, School of Medicine, Tongji University, Shanghai, 200090, People's Republic of China

† These authors contributed equally to this work

***Correspondence:***

Yuen-Shan Ho, School of Nursing, Faculty of Health and Social Sciences, The Hong Kong Polytechnic University, Hong Kong SAR, People's Republic of China, Tel: (+852) 2766-6410, Fax: (+852) 2364-9663, E-mail: [janice.ys.ho@polyu.edu.hk](mailto:janice.ys.ho@polyu.edu.hk)

Qiang-Qiang Fu, Yangpu Hospital, School of Medicine, Tongji University, Shanghai, 200090, People's Republic of China, Tel: (+ 86) 021-6569 0520, Fax: (+ 86) 021-6569 6249; Email: [qiangqiang.fu@tongji.edu.cn](mailto:qiangqiang.fu@tongji.edu.cn)

**APPENDIX 1 Search Strategy for Each Database**

| Databases                                                | Search strategy                                                                                                                                                                                                                                                                                                                                                                                                                                                                                                                                                                                                                                                                                                                                                                                                                                                                                                                                                                                                                                                                                                                                                                                                                                                                                                                                                                                                                                                                                                                                                                                                                                                                                                                                                                                                                                                                                                                                                                                                                                                                       |
|----------------------------------------------------------|---------------------------------------------------------------------------------------------------------------------------------------------------------------------------------------------------------------------------------------------------------------------------------------------------------------------------------------------------------------------------------------------------------------------------------------------------------------------------------------------------------------------------------------------------------------------------------------------------------------------------------------------------------------------------------------------------------------------------------------------------------------------------------------------------------------------------------------------------------------------------------------------------------------------------------------------------------------------------------------------------------------------------------------------------------------------------------------------------------------------------------------------------------------------------------------------------------------------------------------------------------------------------------------------------------------------------------------------------------------------------------------------------------------------------------------------------------------------------------------------------------------------------------------------------------------------------------------------------------------------------------------------------------------------------------------------------------------------------------------------------------------------------------------------------------------------------------------------------------------------------------------------------------------------------------------------------------------------------------------------------------------------------------------------------------------------------------------|
| MEDLINE (via PubMed)                                     | <p>#1 "acupuncture"[MeSH Terms]<br/>                     #2 "acupuncture"[Title/Abstract]<br/>                     #3 "electroacupuncture"[MeSH Terms]<br/>                     #4 "electroacupuncture"[Title/Abstract] OR "electro-acupuncture"[Title/Abstract]<br/>                     #5 "acupressure"[MeSH Terms]<br/>                     #6 "acupressure"[Title/Abstract]<br/>                     #7 "auricular acupuncture"[Title/Abstract] OR "auricular acupressure"[Title/Abstract] OR "ear acupressure"[Title/Abstract]<br/>                     #8 #1 OR #2 OR #3 OR #4 OR #5 OR #6 OR #7<br/>                     #9 "sleep initiation and maintenance disorders"[MeSH Terms]<br/>                     #10 "insomnia"[Title/Abstract]<br/>                     #11 "sleep disorder*"[Title/Abstract]<br/>                     #12 "dyssomnia*"[Title/Abstract]<br/>                     #13 "sleeplessness"[Title/Abstract] OR "sleepless"[Title/Abstract]<br/>                     #14 "early awakening"[Title/Abstract]<br/>                     #15 "difficulty falling asleep"[Title/Abstract] OR "difficulty maintaining sleep"[Title/Abstract]<br/>                     #16 #9 OR #10 OR #11 OR #12 OR #13 OR #14 OR #15<br/>                     #17 "nurse-led"[Title/Abstract] OR "nurse led"[Title/Abstract] OR "nurse-led initiative*"[Title/Abstract]<br/>                     #18 "nursing-led"[Title/Abstract] OR "nursing led"[Title/Abstract]<br/>                     #19 "nurse-administered"[Title/Abstract] OR "nurse administered"[Title/Abstract]<br/>                     #20 "nurse-based"[Title/Abstract] OR "nurse based"[Title/Abstract]<br/>                     #21 "nurse-driven"[Title/Abstract] OR "nurse driven"[Title/Abstract]<br/>                     #22 "nurses"[MeSH Terms]<br/>                     #23 "nurse*"[Title/Abstract]<br/>                     #24 "nursing"[Title/Abstract]<br/>                     #25 #17 OR #18 OR #19 OR #20 OR #21 OR #22 OR #23 OR #24<br/>                     #26 #8 AND #16 AND #25</p> |
| Cochrane Central Register of Controlled Trials (CENTRAL) | <p>#1 (acupuncture):ti,ab,kw<br/>                     #2 (electroacupuncture or electro-acupuncture):ti,ab,kw<br/>                     #3 (acupressure):ti,ab,kw<br/>                     #4 (auricular acupressure or ear acupressure or auricular acupuncture):ti,ab,kw<br/>                     #5 (#1 OR #2 OR #3 OR #4)<br/>                     #6 (insomnia):ti,ab,kw<br/>                     #7 (sleep disorder* or sleep disturbance*):ti,ab,kw<br/>                     #8 (sleeplessness or sleepless):ti,ab,kw<br/>                     #9 (early awakening):ti,ab,kw<br/>                     #10 (difficulty falling asleep or difficulty maintaining sleep):ti,ab,kw<br/>                     #11 (dyssomnia*):ti,ab,kw<br/>                     #12 (#6 OR #7 OR #8 OR #9 OR #10 OR #11)<br/>                     #13 (nurse-led or "nurse led"):ti,ab,kw</p>                                                                                                                                                                                                                                                                                                                                                                                                                                                                                                                                                                                                                                                                                                                                                                                                                                                                                                                                                                                                                                                                                                                                                                                                        |

|                   |                                                                                                                                                                                                                                                                                                                                                                                                                                                                                                                                                                                                                                                                                                                                                                                                                                                                                                                                                                                                                                                                                                                                                                                                                      |
|-------------------|----------------------------------------------------------------------------------------------------------------------------------------------------------------------------------------------------------------------------------------------------------------------------------------------------------------------------------------------------------------------------------------------------------------------------------------------------------------------------------------------------------------------------------------------------------------------------------------------------------------------------------------------------------------------------------------------------------------------------------------------------------------------------------------------------------------------------------------------------------------------------------------------------------------------------------------------------------------------------------------------------------------------------------------------------------------------------------------------------------------------------------------------------------------------------------------------------------------------|
|                   | <p>#14 (nursing-led or "nursing led"):ti,ab,kw<br/> #15 (nurse-administered or "nurse administered"):ti,ab,kw<br/> #16 (nurse-based or "nurse based" or nurse-driven or "nurse driven"):ti,ab,kw<br/> #17 (nurse or nurses or nursing):ti,ab,kw<br/> #18 (#13 OR #14 OR #15 OR #16 OR #17)<br/> #19 (#5 AND #12 AND #18)</p>                                                                                                                                                                                                                                                                                                                                                                                                                                                                                                                                                                                                                                                                                                                                                                                                                                                                                         |
| EMBASE (via Ovid) | <p>#1 'acupuncture'/exp<br/> #2 'acupuncture':ti,ab,kw<br/> #3 'electroacupuncture'/exp<br/> #4 'electroacupuncture':ti,ab,kw OR 'electro-acupuncture':ti,ab,kw<br/> #5 'acupressure'/exp<br/> #6 'acupressure':ti,ab,kw<br/> #7 'auricular acupressure':ti,ab,kw OR 'ear acupressure':ti,ab,kw OR 'auricular acupuncture':ti,ab,kw<br/> #8 #1 OR #2 OR #3 OR #4 OR #5 OR #6 OR #7<br/> #9 'insomnia'/exp<br/> #10 'insomnia':ti,ab,kw<br/> #11 'sleep disorder*':ti,ab,kw<br/> #12 'sleeplessness':ti,ab,kw OR 'sleepless':ti,ab,kw<br/> #13 'early awakening':ti,ab,kw<br/> #14 'difficulty falling asleep':ti,ab,kw OR 'difficulty maintaining sleep':ti,ab,kw<br/> #15 'dyssomnia*':ti,ab,kw<br/> #16 #9 OR #10 OR #11 OR #12 OR #13 OR #14 OR #15<br/> #17 'nurse'/exp<br/> #18 'nurse-led':ti,ab,kw OR 'nurse led':ti,ab,kw<br/> #19 'nursing-led':ti,ab,kw OR 'nursing led':ti,ab,kw<br/> #20 'nurse-administered':ti,ab,kw OR 'nurse administered':ti,ab,kw<br/> #21 'nurse-based':ti,ab,kw OR 'nurse based':ti,ab,kw OR 'nurse-driven':ti,ab,kw OR 'nurse driven':ti,ab,kw<br/> #22 'nurse*':ti,ab,kw OR 'nursing':ti,ab,kw<br/> #23 #17 OR #18 OR #19 OR #20 OR #21 OR #22<br/> #24 #8 AND #16 AND #23</p> |

## APPENDIX 2 Flow Diagram of the Study Selection

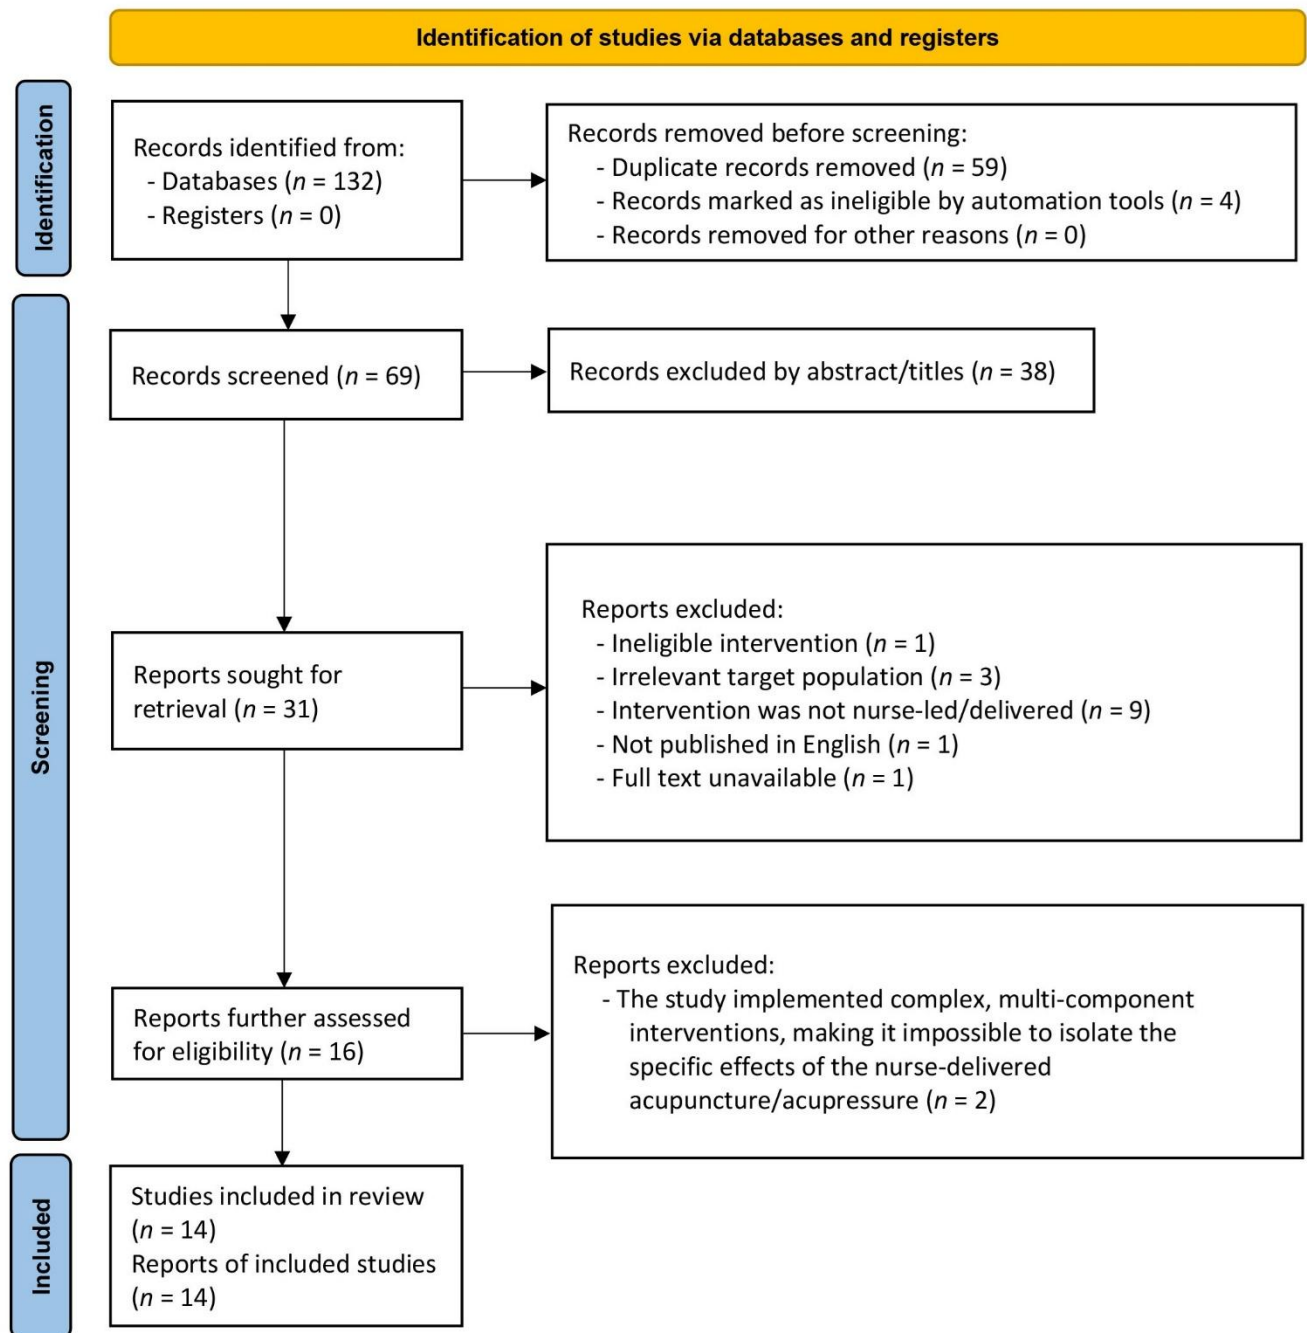

**Notes:** PRISMA Figure was adapted from Page MJ, McKenzie JE, Bossuyt PM, *et al.* The PRISMA 2020 statement: an updated guideline for reporting systematic reviews. *BMJ*, 2021; 372: n71 doi:10.1136/bmj.n71. Creative Commons
